# Supplementary material for: Uterotonics for prevention of postpartum haemorrhage: EN-BIRTH multi-country validation study
Source: PubMed Central journal article supplement (PMC7995712; doi:10.1186/s12884-020-03420-x), 2021-03-26
Supplement: 12884_2020_3420_MOESM1_ESM.pdf [file 12884_2020_3420_MOESM1_ESM.pdf]

Every Newborn BIRTH multi-country validation study: informing measurement of coverage and quality of maternal and newborn care

## Uterotonics for prevention of postpartum haemorrhage: EN-BIRTH multi-country validation study

Additional File 1: Summary of previous validation for measures of uterotonic administration

|                                              | Sample                                 | Maternal Exit Survey* | % Don't Knows | Follow up Survey | % Don't Knows | Maternity Register                             |
|----------------------------------------------|----------------------------------------|-----------------------|---------------|------------------|---------------|------------------------------------------------|
| EN-BIRTH (2019), Bangladesh, Nepal, Tanzania | 23,015 Observed<br>20632 Maternal Exit | IF                    | 9.60%         |                  |               | <5 cell count<br>96% agreement                 |
| Bhattacharya (2019) Nigeria [1]              | 1867 Exit<br>442 FU                    | IF                    | 0%            | IF               | 1%            | <5 cell count<br>93% agreement                 |
| Blanc (2016) Kenya [2]                       | 552                                    | <5 cell count         | <5%           |                  |               |                                                |
| Blanc (2016) Mexico [3,                      | 592                                    | IF                    | 38.30%        |                  |               |                                                |
| McCarthy (2016) Kenya [4]                    | 445 Exit<br>437 FU                     | Sample too small      | 4.50%         | Sample too small | 8.50%         | Not done                                       |
| Stanton (2013) Mozambique [5]                | 289                                    | Neither AUC or IF     | Not reported  |                  |               | Not done                                       |
| Broughton (2013) Afghanistan [6]             | 600                                    |                       |               |                  |               | IF not reported,<br>AUC <0.6 (below threshold) |

\*AUC (area under the curve) defined as  $\geq 0.6$ , IF 0.75-1.25.

### References

1. Bhattacharya AA, Allen E, Umar N, Usman AU, Felix H, Audu A, Schellenberg JR, Marchant T: **Monitoring childbirth care in primary health facilities: a validity study in Gombe State, northeastern Nigeria.** *Journal of global health* 2019, **9**(2).
2. Blanc AK, Diaz C, McCarthy KJ, Berdichevsky K: **Measuring progress in maternal and newborn health care in Mexico: validating indicators of health system contact and quality of care.** *BMC pregnancy and childbirth* 2016, **16**(1):255.
3. Blanc AK, Warren C, McCarthy KJ, Kimani J, Ndwiga C, RamaRao S: **Assessing the validity of indicators of the quality of maternal and newborn health care in Kenya.** *Journal of global health* 2016, **6**(1).
4. Broughton EI, Ikram AN, Sahak I: **How accurate are medical record data in Afghanistan's maternal health facilities? An observational validity study.** *BMJ open* 2013, **3**(4):e002554.
5. McCarthy KJ, Blanc AK, Warren CE, Kimani J, Mdawida B, Ndwidga C: **Can surveys of women accurately track indicators of maternal and newborn care? A validity and reliability study in Kenya.** *Journal of global health* 2016, **6**(2).
6. Stanton CK, Rawlins B, Drake M, dos Anjos M, Cantor D, Chongo L, Chavane L, da Luz Vaz M, Ricca J: **Measuring coverage in MNCH: Testing the validity of women's self-report of key maternal and newborn health Interventions during the peripartum period in Mozambique.** *PLoS One* 2013, **8**(5):e60694.
