# Supplementary material for: Uterotonics for prevention of postpartum haemorrhage: EN-BIRTH multi-country validation study
Source: PubMed Central journal article supplement (PMC7995712; doi:10.1186/s12884-020-03420-x), 2021-03-26
Supplement: 12884_2020_3420_MOESM4_ESM.pdf [file 12884_2020_3420_MOESM4_ESM.pdf]

Every Newborn BIRTH multi-country validation study: informing measurement of coverage and quality of maternal and newborn care

## Uterotonics for prevention of postpartum haemorrhage: EN-BIRTH multi-country validation study

Additional File 4: Data collection dates by site, EN-BIRTH study.

| EN-BIRTH study                                                       | Bangladesh          |                                              | Nepal              | Tanzania           |                    | All sites    |
|----------------------------------------------------------------------|---------------------|----------------------------------------------|--------------------|--------------------|--------------------|--------------|
|                                                                      | Azimpur Tertiary    | Kushtia District                             | Pokhara Regional   | Temeke Regional    | Muhimbili National |              |
| <b>Tablet data collection dates</b>                                  | 17/8/17 to 30/4/18  | 11/7/17 to 30/5/18                           | 17/7/17 to 31/7/18 | 3/7/17 to 30/5/18  | 3/7/17 to 28/2/18  |              |
| Duration                                                             | 8 months            | 10 months                                    | 1 year             | 10 months          | 7 months           |              |
| Original register used:                                              | 17/8/17 to 18/10/17 | 25/8/17 to 27/9/17<br>(due to short supply)  | Not applicable     | Not applicable     | Not applicable     |              |
| Revised register used:                                               | 19/10/17 to 30/4/18 | 11/7/17 to 24/8/17<br>and 28/9/17 to 30/5/18 | Not applicable     | Not applicable     | Not applicable     |              |
| <b>Register extraction comparison dates to assess biases</b>         |                     |                                              |                    |                    |                    |              |
| <b>Pre-study</b>                                                     | 1/1/16 to 31/12/16  | 1/1/16 to 31/12/16                           | 1/4/16 to 31/3/17  | 1/1/16 to 31/12/16 | 1/1/16 to 31/12/16 |              |
| Duration                                                             | 12 months           | 12 months                                    | 12 months          | 12 months          | 12 months          |              |
| <b>During/after-study</b>                                            | 17/8/17 to 17/8/18  | 11/7/17 to 11/7/18                           | 17/7/17 to 17/7/18 | 3/7/17 to 3/7/18   | 3/7/17 to 3/7/18   |              |
| Duration                                                             | 12 months           | 12 months                                    | 12 months          | 12 months          | 12 months          |              |
| <b>Time elapsed between delivery and exit survey interview/ days</b> |                     |                                              |                    |                    |                    |              |
|                                                                      | n (%)               | n (%)                                        | n (%)              | n (%)              | n (%)              | n (%)        |
| <b>Total</b>                                                         | 2844                | 2331                                         | 6922               | 5752               | 2783               | 20632        |
| 0-1 day                                                              | 725 (25.5)          | 1345 (57.7)                                  | 5854 (84.6)        | 5433 (94.5)        | 1009 (36.3)        | 14366 (69.6) |
| 2-3 days                                                             | 511 (18)            | 846 (36.3)                                   | 833 (12)           | 181 (3.1)          | 1098 (39.5)        | 3469 (16.8)  |
| 4+ days                                                              | 1599 (56.2)         | 127 (5.4)                                    | 154 (2.2)          | 43 (0.7)           | 597 (21.5)         | 2520 (12.2)  |
| Missing                                                              | 9 (0.3)             | 13 (0.6)                                     | 81 (1.2)           | 95 (1.7)           | 79 (2.8)           | 277 (1.3)    |
| Mean                                                                 | 3.1                 | 1.3                                          | 0.6                | 0.7                | 3.2                | 1.4          |
| Median                                                               | 4.0                 | 0.0                                          | 0.0                | 0.0                | 2.0                | 1.0          |

Sample size was calculated to observe at least 106 observations per intervention per country, based on estimated coverage of intervention during formative research [1].

1. Day LT, Ruysen H, Gordeev VS, et al. "Every Newborn-BIRTH" protocol: observational study validating indicators for coverage and quality of maternal and newborn health care in Bangladesh, Nepal and Tanzania. *Journal of Global Health* 2019; **9**(1).
