# Supplementary material for: Uterotonics for prevention of postpartum haemorrhage: EN-BIRTH multi-country validation study
Source: PubMed Central journal article supplement (PMC7995712; doi:10.1186/s12884-020-03420-x), 2021-03-26
Supplement: 12884_2020_3420_MOESM5_ESM.pdf [file 12884_2020_3420_MOESM5_ESM.pdf]

Every Newborn BIRTH multi-country validation study: informing measurement of coverage and quality of maternal and newborn care

## Uterotonics for prevention of postpartum haemorrhage: EN-BIRTH multi-country validation study

Additional File 5: Facility register design and completion approaches for uterotonics by site, EN-BIRTH study (n=22,002)

|                                                           | Bangladesh        |                              |                   |                              | Nepal            | Tanzania                |                         |
|-----------------------------------------------------------|-------------------|------------------------------|-------------------|------------------------------|------------------|-------------------------|-------------------------|
|                                                           | Azimpur Tertiary  |                              | Kushtia District  |                              | Pokhara Regional | Temeke Regional         | Muhimbili National      |
|                                                           | Original register | Revised register             | Original register | Revised register             |                  |                         |                         |
| <b>Register design:</b> Column allotted data element      | non-specific      | specific column              | non-specific      | specific column              | no column        | specific 2 columns      | specific 2 columns      |
| Column 1 heading                                          | Drugs given       | AMTSL<br>(footnote oxytocin) | Drugs given       | AMTSL<br>(footnote oxytocin) |                  | Mother given uterotonic | Mother given uterotonic |
| Column 1: data element completed if uterotonic given      | "NVD drugs given" | tick for 'given'             | drug name         | tick for 'given'             |                  | yes (in Swahili)        | yes (in Swahili)        |
| Column 1: data element completed if uterotonic not given  | to leave blank    | to leave blank               | to leave blank    | to leave blank               |                  | no (in Swahili)         | no (in Swahili)         |
| Column 2 heading                                          |                   |                              |                   |                              |                  | AMTSL                   | AMTSL                   |
| Column 2: data element completed if uterotonic given      |                   |                              |                   |                              |                  | O (=oxytocin)           | O (=oxytocin)           |
|                                                           |                   |                              |                   |                              |                  | E (=ergometrine)        | E (=ergometrine)        |
|                                                           |                   |                              |                   |                              |                  | M (=misoprostol)        | M (=misoprostol)        |
| Column 2: data element completed if uterotonic not given  |                   |                              |                   |                              |                  | dash or No (in Swahili) | dash or No (in Swahili) |
| <b>Completeness</b> Data element recorded in register     | not possible*     | not possible*                | not possible*     | not possible*                |                  | 99.2%                   | 68.6%                   |
| <b>External Consistency</b>                               |                   |                              |                   |                              |                  |                         |                         |
| <i>Indicator:</i> Observed coverage %                     | 98.9%             | 98.9%                        | 99.8%             | 99.8%                        |                  | 99.3%                   | 98.4%                   |
| <i>Indicator:</i> Measured coverage - register recorded % | 17.8%             | 99.4%                        | 0.0%              | 21.6%                        |                  | 97.6%                   | 64.5%                   |
| <i>Measurement gap:</i> Register recorded and observed    | 81.1%             | 0.6%                         | 99.8%             | 78.2%                        |                  | 1.7%                    | 34.0%                   |
|                                                           | Under-estimate    | Under-estimate               | Under-estimate    | Under-estimate               |                  | Under-estimate          | Under-estimate          |

| <b>Key</b>                           | >20%   | Poor      |
|--------------------------------------|--------|-----------|
| no column for data element           | 16-20% | Moderate  |
| non-specific column for data element | 11-15% | Good      |
| specific column                      | 6-10%  | Very Good |
|                                      | 0-5%   | Excellent |

N=22,002 women with register recorded birth record

For validity analysis, register recorded n=14,221 (all register data from Tanzania + revised register data from Bangladesh) [1]

\*Completeness calculations are "not possible" for Bangladesh registers as the instructions state leave blank if intervention/practice is not done.

Cut-off ranges adapted from WHO Data Quality Review, Module 2 "Desk review of data quality" [2]

## References

1. Day L, Rahman QS, Rahman A, Salim N, KC A, Ruysen H, Tahsina T, Masanja H, Basnet O, Gore-langton G *et al*: **Assessment of the validity of the measurement of newborn and maternal health-care coverage in hospitals (EN-BIRTH): a mixed-methods observational study** *Lancet Global* (2020) DOI: 10.1016/S2214-109X(20)30504-0.
2. World Health Organisation: **Data quality review: a toolkit for facility data quality assessment. Module 2: Desk review of data quality** WHO. Geneva; 2017.
