# Supplementary material for: Uterotonics for prevention of postpartum haemorrhage: EN-BIRTH multi-country validation study
Source: PubMed Central journal article supplement (PMC7995712; doi:10.1186/s12884-020-03420-x), 2021-03-26
Supplement: 12884_2020_3420_MOESM6_ESM.pdf [file 12884_2020_3420_MOESM6_ESM.pdf]

Every Newborn BIRTH multi-country validation study: informing measurement of coverage and quality of maternal and newborn care

## Uterotonics for prevention of postpartum haemorrhage: EN-BIRTH multi-country validation study

Additional File 6: Inter-observer agreement for uterotonic administration using Kappa, EN-BIRTH study

|                 |      | Bangladesh       |                  | Nepal            | Tanzania        |                    |
|-----------------|------|------------------|------------------|------------------|-----------------|--------------------|
| n               |      | Azimpur Tertiary | Kushtia District | Pokhara Regional | Temeke Regional | Muhimbili National |
| Observation     | 2544 | 1.000            | 1.000            | 1.000            | 0.599           | 1.000              |
| Data Extraction | 2131 | 1.000            | 0.652            |                  | 0.060           | -0.109             |

L&D= Labour and delivery

Kappa agreement cut offs for high/ substantial disagreement:  $\geq 0.71$  for observation and  $\geq 0.91$  for data extraction [1]

### Reference

1. Day L, Rahman QS, Rahman A, Salim N, KC A, Ruysen H, Tahsina T, Masanja H, Basnet O, Gore-langton G *et al*: **Assessment of the validity of the measurement of newborn and maternal health-care coverage in hospitals (EN-BIRTH): a mixed-methods observational study** Lancet Global (2020) DOI: 10.1016/S2214-109X(20)30504-0.
