# Supplementary material for: Uterotonics for prevention of postpartum haemorrhage: EN-BIRTH multi-country validation study
Source: PubMed Central journal article supplement (PMC7995712; doi:10.1186/s12884-020-03420-x), 2021-03-26
Supplement: 12884_2020_3420_MOESM9_ESM.pdf [file 12884_2020_3420_MOESM9_ESM.pdf]

Every Newborn BIRTH multi-country validation study: informing measurement of coverage and quality of maternal and newborn care

## Uterotonics for prevention of postpartum haemorrhage: EN-BIRTH multi-country validation study

Additional File 9: Individual-level validation of exit-survey report for uterotonic administration, EN-BIRTH Study (n=23,015)

|                              | Bangladesh       |             |                 |             | Nepal            |             | Tanzania        |             |                    |           | All sites Pooled |             |
|------------------------------|------------------|-------------|-----------------|-------------|------------------|-------------|-----------------|-------------|--------------------|-----------|------------------|-------------|
|                              | Azimpur Tertiary |             | Kustia District |             | Pokhara Regional |             | Temeke Regional |             | Muhimbili National |           | Random Effects   |             |
|                              | %                | 95% CI      | %               | 95% CI      | %                | 95% CI      | %               | 95% CI      | %                  | 95% CI    | %                | 95% CI      |
| <b>All modes of Birth</b>    |                  |             |                 |             |                  |             |                 |             |                    |           |                  |             |
| Observer-assessed coverage % | 98.9             | (98.4,99.2) | 99.8            | (99.5,99.9) | 99.9             | (99.8,99.9) | 99.3            | (99.1,99.5) | 98.4               | (98,98.8) | 99.4             | (98.7,99.8) |
| Survey reported prevalence % | 80.3             | (78.8,81.7) | 88.2            | (86.8,89.5) | 82.0             | (81,82.8)   | 91.7            | (90.9,92.4) | 79.5               | (78,81)   | 84.7             | (79.1,89.5) |
| "Don't know" responses %     | 14.4             |             | 2.1             |             | 12.5             |             | 5.1             |             | 13.3               |           | 8.7              | (4.5,14.1)  |

### Current survey - Count "don't know" as "no"

| > 10 counts in either column of 2x2 table  | Yes  | No          |      | No |      | Yes | Yes  |             |      |             |      |             |
|--------------------------------------------|------|-------------|------|----|------|-----|------|-------------|------|-------------|------|-------------|
|                                            |      |             |      |    |      |     |      |             |      |             |      |             |
| Percent agreement (TN+TP/n) all observed % | 79.8 |             | 88.1 |    | 83.0 |     | 92.0 |             | 79.2 |             | 84.7 | (79.4,89.4) |
| Sensitivity % (95% CI)                     | 80.3 | (78.8,81.8) | +    | +  | +    | +   | 91.8 | (91,92.5)   | 79.7 | (78.1,81.2) | 84.9 | (79.6,89.6) |
| Specificity % (95% CI)                     | 28.0 | (12.1,49.4) | +    | +  | +    | +   | 33.3 | (14.6,57)   | 41.7 | (22.1,63.4) | 32.5 | (21.2,44.6) |
| Positive Predictive Value % (95% CI)       | 99.2 | (98.8,99.5) | +    | +  | +    | +   | 99.7 | (99.6,99.9) | 99.3 | (98.9,99.6) |      |             |
| Negative Predictive Value % (95% CI)       | 1.2  | (0.5,2.6)   | +    | +  | +    | +   | 1.5  | (0.6,3)     | 1.8  | (0.9,3.3)   |      |             |
| AUC and "accuracy"                         | 0.5  | low         | +    | +  | +    | +   | 0.6  | Moderate    | 0.6  | Moderate    |      |             |
| Inflation Factor and "Bias"                | 0.8  | low         | +    | +  | +    | +   | 0.9  | low         | 0.8  | low         |      |             |

### Consider only "yes" and "no" (exclude don't know)

| > 10 counts in either column of 2x2 table    | No   | No          |      | No |      | Yes | Yes  |             |      |             |      |             |
|----------------------------------------------|------|-------------|------|----|------|-----|------|-------------|------|-------------|------|-------------|
|                                              |      |             |      |    |      |     |      |             |      |             |      |             |
| Percent agreement (TN+TP/n) 2x2 table only % | 93.1 |             | 90.1 |    | 93.8 |     | 96.4 |             | 91.3 |             | 93.1 | (90.7,95.2) |
| Sensitivity (95% CI)                         | 93.8 | (92.8,94.8) | +    | +  | +    | +   | 96.6 | (96.1,97.1) | 91.8 | (90.6,92.9) | 93.5 | (91.1,95.5) |
| Specificity (95% CI)                         | 18.2 | (5.2,40.3)  | +    | +  | +    | +   | 17.6 | (3.8,43.4)  | 26.3 | (9.1,51.2)  | 17.3 | (7.4,29.4)  |
| Positive Predictive Value (95% CI)           | 99.2 | (98.8,99.5) | +    | +  | +    | +   | 99.7 | (99.6,99.9) | 99.3 | (98.9,99.6) |      |             |
| Negative Predictive Value (95% CI)           | 2.6  | (0.7,6.6)   | +    | +  | +    | +   | 1.6  | (0.3,4.7)   | 2.6  | (0.8,5.9)   |      |             |
| AUC and "accuracy"                           | 0.6  | low         | +    | +  | +    | +   | 0.6  | low         | 0.6  | low         |      |             |
| Inflation Factor and "Bias"                  | 0.9  | low         | +    | +  | +    | +   | 1.0  | low         | 0.9  | low         |      |             |

| Vaginal births               |      |             |      |             |      |             |      |             |      |             |      |             |
|------------------------------|------|-------------|------|-------------|------|-------------|------|-------------|------|-------------|------|-------------|
| Observer-assessed coverage % | 98.2 | (96.9,98.9) | 99.8 | (99.3,99.9) | 99.9 | (99.8,100)  | 99.8 | (99.7,99.9) | 99.3 | (98.7,99.6) | 99.6 | (99.1,99.9) |
| Survey reported prevalence % | 80.8 | (77.8,83.5) | 85.6 | (83.6,87.3) | 91.1 | (90.4,91.8) | 94.1 | (93.5,94.7) | 92.3 | (90.6,93.8) | 89.3 | (85.3,92.8) |
| "Don't know" responses %     | 6.8  |             | 1.0  |             | 4.3  |             | 2.9  |             | 2.7  |             | 3.2  | (2.0,4.8)   |

**Current survey - Count "don't know" as "no"**

|                                            |      |             |      |   |      |   |      |   |      |   |      |             |
|--------------------------------------------|------|-------------|------|---|------|---|------|---|------|---|------|-------------|
| > 10 counts in either column of 2x2 table  | Yes  |             | No   |   | No   |   | No   |   | No   |   |      |             |
| Percent agreement (TN+TP/n) all observed % | 79.9 |             | 85.4 |   | 91.1 |   | 94.0 |   | 92.1 |   | 89.1 | (85.0,92.6) |
| Sensitivity % (95% CI)                     | 80.9 | (77.9,83.7) | +    | + | +    | + | +    | + | +    | + | 89.4 | (85.4,92.8) |
| Specificity % (95% CI)                     | 25.0 | (5.5,57.2)  | +    | + | +    | + | +    | + | +    | + | 20.4 | (6.4,37.9)  |
| Positive Predictive Value % (95% CI)       | 98.5 | (97.2,99.3) | +    | + | +    | + | +    | + | +    | + |      |             |
| Negative Predictive Value % (95% CI)       | 2.1  | (0.4,6)     | +    | + | +    | + | +    | + | +    | + |      |             |
| AUC and "accuracy"                         | 0.5  | low         | +    | + | +    | + | +    | + | +    | + |      |             |
| Inflation Factor and "Bias"                | 0.8  | low         | +    | + | +    | + | +    | + | +    | + |      |             |

**Consider only "yes" and "no" (exclude don't know)**

|                                              |      |             |      |   |      |   |      |   |      |   |      |             |
|----------------------------------------------|------|-------------|------|---|------|---|------|---|------|---|------|-------------|
| > 10 counts in either column of 2x2 table    | Yes  |             | No   |   | No   |   | No   |   | No   |   |      |             |
| Percent agreement (TN+TP/n) 2x2 table only % | 85.7 |             | 86.3 |   | 95.1 |   | 96.8 |   | 94.7 |   | 92.4 | (88.3,95.7) |
| Sensitivity (95% CI)                         | 86.8 | (84,89.2)   | +    | + | +    | + | +    | + | +    | + | 92.7 | (88.7,95.9) |
| Specificity (95% CI)                         | 18.2 | (2.3,51.8)  | +    | + | +    | + | +    | + | +    | + | 15.7 | (3.1,33.1)  |
| Positive Predictive Value (95% CI)           | 98.5 | (97.2,99.3) | +    | + | +    | + | +    | + | +    | + |      |             |
| Negative Predictive Value (95% CI)           | 2.2  | (0.3,7.6)   | +    | + | +    | + | +    | + | +    | + |      |             |
| AUC and "accuracy"                           | 0.5  | low         | +    | + | +    | + | +    | + | +    | + |      |             |
| Inflation Factor and "Bias"                  | 0.9  | low         | +    | + | +    | + | +    | + | +    | + |      |             |

| Caesarean Births             |      |             |       |             |      |             |      |             |      |             |      |             |
|------------------------------|------|-------------|-------|-------------|------|-------------|------|-------------|------|-------------|------|-------------|
| Observer-assessed coverage % | 99.4 | (98.9,99.6) | 100.0 | -           | 99.8 | (99.2,100)  | 98.3 | (96.6,99.1) | 99.1 | (98.6,99.5) | 99.5 | (98.9,99.9) |
| Survey reported prevalence % | 80.1 | (78.3,81.7) | 92.0  | (90.1,93.5) | 29.6 | (26.8,32.5) | 50.2 | (44.7,55.6) | 70.8 | (68.5,73)   | 66.3 | (44.0,85.3) |
| "Don't know" responses %     | 17.1 |             | 3.7   |             | 59.3 |             | 42.4 |             | 20.5 |             | 26.0 | (10.1,46.1) |

**Current survey - Count "don't know" as "no"**

|                                            |      |             |      |   |      |   |      |   |      |   |      |             |
|--------------------------------------------|------|-------------|------|---|------|---|------|---|------|---|------|-------------|
| > 10 counts in either column of 2x2 table  | Yes  |             | No   |   | No   |   | No   |   | No   |   |      |             |
| Percent agreement (TN+TP/n) all observed % | 79.7 |             | 92.0 |   | 31.0 |   | 52.0 |   | 70.5 |   | 66.7 | (45.3,85.0) |
| Sensitivity % (95% CI)                     | 80.1 | (78.3,81.8) | +    | + | +    | + | +    | + | +    | + | 66.6 | (45.1,85.0) |
| Specificity % (95% CI)                     | 30.8 | (9.1,61.4)  | +    | + | +    | + | +    | + | +    | + | 62.8 | (16.1,99.1) |

|                                      |      |           |   |   |   |   |   |   |   |   |  |
|--------------------------------------|------|-----------|---|---|---|---|---|---|---|---|--|
| Positive Predictive Value % (95% CI) | 99.5 | (99,99.8) | + | + | + | + | + | + | + | + |  |
| Negative Predictive Value % (95% CI) | 1.0  | (0.3,2.4) | + | + | + | + | + | + | + | + |  |
| AUC and "accuracy"                   | 0.6  | low       | + | + | + | + | + | + | + | + |  |
| Inflation Factor and "Bias"          | 0.8  | low       | + | + | + | + | + | + | + | + |  |

**Consider only "yes" and "no" (exclude don't know)**

|                                              |      |             |      |   |      |   |      |   |      |   |                  |
|----------------------------------------------|------|-------------|------|---|------|---|------|---|------|---|------------------|
| > 10 counts in either column of 2x2 table    | Yes  |             | No   |   | No   |   | No   |   | No   |   |                  |
| Percent agreement (TN+TP/n) 2x2 table only % | 96.1 |             | 95.5 |   | 74.2 |   | 88.1 |   | 88.6 |   | 89.7 (82.5,95.2) |
| Sensitivity (95% CI)                         | 96.6 | (95.7,97.4) | +    | + | +    | + | +    | + | +    | + | 90.0 (82.5,95.5) |
| Specificity (95% CI)                         | 18.2 | (2.3,51.8)  | +    | + | +    | + | +    | + | +    | + | 32.5 (0.2,78.4)  |
| Positive Predictive Value (95% CI)           | 99.5 | (99,99.8)   | +    | + | +    | + | +    | + | +    | + |                  |
| Negative Predictive Value (95% CI)           | 3.3  | (0.4,11.5)  | +    | + | +    | + | +    | + | +    | + |                  |
| AUC and "accuracy"                           | 0.6  | low         | +    | + | +    | + | +    | + | +    | + |                  |
| Inflation Factor and "Bias"                  | 1.0  | low         | +    | + | +    | + | +    | + | +    | + |                  |

**Don't Know Responses**

|                      |
|----------------------|
| >20% : Poor          |
| 15.1-20 % : Moderate |
| 10.1-15 % : Good     |
| 5.1-10 % : Very Good |
| 0-5 % : Excellent    |

N= 23,015 women observer-assessed to give birth

CI=confidence interval

HMIS= health management information system

AUC= Area under the curve

+=result suppressed due to 10 or fewer count per column of two-by-two table for some results.

As reported in an associated paper [1]

**Reference**

1. Day L, Rahman QS, Rahman A, Salim N, KC A, Ruysen H, Tahsina T, Masanja H, Basnet O, Gore-langton G *et al*: **Assessment of the validity of the measurement of newborn and maternal health-care coverage in hospitals (EN-BIRTH): a mixed-methods observational study** *Lancet Global* (2020) DOI: 10.1016/S2214-109X(20)30504-0.
