# Supplementary material for: Uterotonics for prevention of postpartum haemorrhage: EN-BIRTH multi-country validation study
Source: PubMed Central journal article supplement (PMC7995712; doi:10.1186/s12884-020-03420-x), 2021-03-26
Supplement: 12884_2020_3420_MOESM10_ESM.pdf [file 12884_2020_3420_MOESM10_ESM.pdf]

Every Newborn BIRTH multi-country validation study: informing measurement of coverage and quality of maternal and newborn care

## Uterotonics for prevention of postpartum haemorrhage: EN-BIRTH multi-country validation study

Additional File 10: Individual-level validation of register recording for uterotonic administration, EN-BIRTH study (n=15,645)

| Bangladesh       |  |                 |  | Nepal            |  | Tanzania        |  |                  |  | All sites Pooled |  |
|------------------|--|-----------------|--|------------------|--|-----------------|--|------------------|--|------------------|--|
| Azimpur Tertiary |  | Kustia District |  | Pokhara Regional |  | Temeke Regional |  | Azimpur National |  | Random Effects   |  |

| All Modes Of Birth             | Bangladesh |             | Nepal |             | Tanzania |        | Tanzania |             | All sites Pooled |             |      |             |
|--------------------------------|------------|-------------|-------|-------------|----------|--------|----------|-------------|------------------|-------------|------|-------------|
|                                | %          | 95% CI      | %     | 95% CI      | %        | 95% CI | %        | 95% CI      | %                | 95% CI      |      |             |
| Observer-assessed Coverage %   | 98.9       | (98.4,99.2) | 99.8  | (99.5,99.9) | N/A      | N/A    | 99.3     | (99.1,99.5) | 98.4             | (98.0,98.8) | 99.2 | (98.6,99.7) |
| Register recorded prevalence % | 99.4       | (99,99.7)   | 21.6  | (19.9,23.4) | N/A      | N/A    | 97.6     | (97.2,97.9) | 64.5             | (62.9,66)   | 77.9 | (37.8,99.5) |
| Not recorded %                 | 0.0        |             | 0.0   |             | N/A      |        | 0.8      |             | 31.4             |             | 3.1  | (0.0,19.1)  |
| Not readable %                 | 0.0        |             | 0.1   |             | N/A      |        | 0.1      |             | 0.1              |             | 0.1  | (0.0,0.1)   |

### Current HMIS - count "not recorded" as "no"

| > 10 counts in either column of 2x2 table | Yes                                        |             |   | No   |     |     | N/A  |             |      | Yes         |      |             | Yes |             |  |
|-------------------------------------------|--------------------------------------------|-------------|---|------|-----|-----|------|-------------|------|-------------|------|-------------|-----|-------------|--|
|                                           | Percent agreement (TN+TP/n) all observed % | 99.0        |   | 21.6 |     | N/A |      | 97.3        |      | 64.5        |      | 77.2        |     | (37.7,99.3) |  |
| Sensitivity % (95% CI)                    | 99.5                                       | (99,99.7)   | + | +    | N/A | N/A | 97.6 | (97.2,98)   | 64.6 | (63,66.2)   | 78.0 | (37.8,99.5) |     |             |  |
| Specificity % (95% CI)                    | 10.0                                       | (0.3,44.5)  | + | +    | N/A | N/A | 8.3  | (1,27)      | 51.7 | (32.5,70.6) | 22.8 | (1.7,53.6)  |     |             |  |
| Positive Predictive Value % (95% CI)      | 99.6                                       | (99.2,99.8) | + | +    | N/A | N/A | 99.7 | (99.5,99.8) | 99.4 | (99,99.7)   |      |             |     |             |  |
| Negative Predictive Value % (95% CI)      | 7.7                                        | (0.2,36)    | + | +    | N/A | N/A | 1.3  | (0.2,4.6)   | 1.2  | (0.7,2)     |      |             |     |             |  |
| AUC and "accuracy"                        | 0.6                                        | low         | + | +    | N/A | N/A | 0.5  | low         | 0.6  | low         |      |             |     |             |  |
| Inflation Factor and "Bias"               | 1.0                                        | low         | + | +    | N/A | N/A | 1.0  | low         | 0.6  | Moderate    |      |             |     |             |  |

### Consider only "given" and "not given" (exclude not recorded)

| > 10 counts in either column of 2x2 table | Yes                                          |             |   | No   |     |     | N/A  |             |      | Yes        |      |              | Yes |              |  |
|-------------------------------------------|----------------------------------------------|-------------|---|------|-----|-----|------|-------------|------|------------|------|--------------|-----|--------------|--|
|                                           | Percent agreement (TN+TP/n) 2x2 table only % | 99.1        |   | 21.6 |     | N/A |      | 98.1        |      | 93.6       |      | 86.1         |     | (48.5,100.0) |  |
| Sensitivity % (95% CI)                    | 99.5                                         | (99.1,99.7) | + | +    | N/A | N/A | 98.4 | (98.1,98.7) | 94.1 | (93.1,95)  | 3.5  | (0.0,17.2)   |     |              |  |
| Specificity % (95% CI)                    | 10.0                                         | (0.3,44.5)  | + | +    | N/A | N/A | 0.0  | (0,15.4)    | 6.7  | (0.2,31.9) | 85.2 | (48.1,100.0) |     |              |  |
| Positive Predictive Value % (95% CI)      | 99.6                                         | (99.2,99.8) | + | +    | N/A | N/A | 99.7 | (99.5,99.8) | 99.4 | (99,99.7)  |      |              |     |              |  |
| Negative Predictive Value % (95% CI)      | 8.3                                          | (0.2,38.5)  | + | +    | N/A | N/A | 0.0  | (0,3.6)     | 0.7  | (0,3.9)    |      |              |     |              |  |
| AUC and "accuracy"                        | 0.6                                          | low         | + | +    | N/A | N/A | 0.5  | low         | 0.5  | low        |      |              |     |              |  |
| Inflation Factor and "Bias"               | 1.0                                          | low         | + | +    | N/A | N/A | 1.0  | low         | 0.9  | low        |      |              |     |              |  |

| Vaginal Births                 |      |             |      |             |      |            |      |             |       |             |      |              |
|--------------------------------|------|-------------|------|-------------|------|------------|------|-------------|-------|-------------|------|--------------|
| Observer-assessed coverage %   | 98.2 | (96.9,98.9) | 99.8 | (99.3,99.9) | 99.9 | (99.8,100) | 99.8 | (99.7,99.9) | 99.3  | (98.7,99.6) | 99.4 | (98.7,99.9)  |
| Register recorded prevalence % | 98.9 | (97.6,99.5) | 32.8 | (30.2,35.5) | N/A  | N/A        | 97.6 | (97.2,97.9) | 92.5  | (91,93.7)   | 86.6 | (55.0,100.0) |
| Not recorded %                 | 0.0  |             | 0.0  |             | N/A  |            | 0.8  |             | 500.0 |             | 0.7  | (0.0,2.9)    |
| Not readable %                 | 0.2  |             | 0.1  |             | N/A  |            | 0.1  |             | 0.0   |             | 0.0  | (0.0,0.1)    |

**Current HMIS - count "not recorded" as "no"**

|                                            |      |             |      |   |     |     |      |             |      |   |      |              |
|--------------------------------------------|------|-------------|------|---|-----|-----|------|-------------|------|---|------|--------------|
| > 10 counts in either column of 2x2 table  | No   |             | No   |   | N/A |     | Yes  |             | No   |   |      |              |
| Percent agreement (TN+TP/n) all observed % | 98.4 |             | 32.7 |   | N/A |     | 97.4 |             | 91.9 |   | 85.9 | (54.4,100.0) |
| Sensitivity % (95% CI)                     | 98.9 | (97.7,99.6) | +    | + | N/A | N/A | 97.6 | (97.2,98)   | +    | + | 86.5 | (54.9,100.0) |
| Specificity % (95% CI)                     | 0.0  | (0,70.8)    | +    | + | N/A | N/A | 9.1  | (0.2,41.3)  | +    | + | 3.6  | (0.0,19.1)   |
| Positive Predictive Value % (95% CI)       | 99.5 | (98.4,99.9) | +    | + | N/A | N/A | 99.8 | (99.7,99.9) | +    | + |      |              |
| Negative Predictive Value % (95% CI)       | 0.0  | (0,45.9)    | +    | + | N/A | N/A | 0.7  | (0,3.8)     | +    | + |      |              |
| AUC and "accuracy"                         | 0.5  | low         | +    | + | N/A | N/A | 0.5  | low         | +    | + |      |              |
| Inflation Factor and "Bias"                | 1.0  | low         | +    | + | N/A | N/A | 1.0  | low         | +    | + |      |              |

**Consider only "given" and "not given" (exclude not recorded)**

|                                              |      |   |      |   |     |     |      |             |      |   |      |              |
|----------------------------------------------|------|---|------|---|-----|-----|------|-------------|------|---|------|--------------|
| > 10 counts in either column of 2x2 table    | No   |   | No   |   | N/A |     | Yes  |             | No   |   |      |              |
| Percent agreement (TN+TP/n) 2x2 table only % | 98.6 |   | 32.7 |   | N/A |     | 98.3 |             | 96.8 |   | 88.3 | (56.2,100.0) |
| Sensitivity % (95% CI)                       | +    | + | +    | + | N/A | N/A | 98.4 | (98.1,98.7) | +    | + | 89.0 | (56.9,100.0) |
| Specificity % (95% CI)                       | +    | + | +    | + | N/A | N/A | 0.0  | (0,30.8)    | +    | + | 0.2  | (0.0,11.5)   |
| Positive Predictive Value % (95% CI)         | +    | + | +    | + | N/A | N/A | 99.8 | (99.7,99.9) | +    | + |      |              |
| Negative Predictive Value % (95% CI)         | +    | + | +    | + | N/A | N/A | 0.0  | (0,3.8)     | +    | + |      |              |
| AUC and "accuracy"                           | +    | + | +    | + | N/A | N/A | 0.5  | low         | +    | + |      |              |
| Inflation Factor and "Bias"                  | +    | + | +    | + | N/A | N/A | 1.0  | low         | +    | + |      |              |

| Caesarean Births               |      |             |       |           |      |            |      |             |      |             |      |              |
|--------------------------------|------|-------------|-------|-----------|------|------------|------|-------------|------|-------------|------|--------------|
| Observer-assessed coverage %   | 99.4 | (98.9,99.6) | 100.0 | (100,100) | 99.8 | (99.2,100) | 98.3 | (96.6,99.1) | 99.1 | (98.6,99.5) | 99.4 | (98.7,99.9)  |
| Register recorded prevalence % | 99.6 | (99.2,99.8) | 6.0   | (4.5,7.7) | N/A  | N/A        | 98.0 | (96.2,99)   | 43.1 | (41,45.3)   | 68.5 | (15.5,100.0) |
| Not recorded %                 | 0.0  |             | 0.0   |           | N/A  |            | 0.4  |             | 51.5 |             | 5.0  | (0.0,39.1)   |
| Not readable %                 | 0.0  |             | 0.1   |           | N/A  |            | 0.0  |             | 0.2  |             | 0.1  | (0.0,0.2)    |

**Current HMIS - count "not recorded" as "no"**

|                                            |      |   |     |   |     |     |      |   |      |             |      |              |
|--------------------------------------------|------|---|-----|---|-----|-----|------|---|------|-------------|------|--------------|
| > 10 counts in either column of 2x2 table  | No   |   | No  |   | N/A |     | No   |   | Yes  |             |      |              |
| Percent agreement (TN+TP/n) all observed % | 99.3 |   | 6.0 |   | N/A |     | 96.9 |   | 43.5 |             | 67.2 | (15.6,99.7)  |
| Sensitivity % (95% CI)                     | +    | + | +   | + | N/A | N/A | +    | + | 43.3 | (41.1,45.5) | 68.5 | (15.5,100.0) |

|                                      |   |   |   |   |     |     |   |   |      |             |      |            |
|--------------------------------------|---|---|---|---|-----|-----|---|---|------|-------------|------|------------|
| Specificity % (95% CI)               | + | + | + | + | N/A | N/A | + | + | 75.0 | (42.8,94.5) | 18.5 | (0.0,82.1) |
| Positive Predictive Value % (95% CI) | + | + | + | + | N/A | N/A | + | + | 99.4 | (98.9,99.7) |      |            |
| Negative Predictive Value % (95% CI) | + | + | + | + | N/A | N/A | + | + | 0.8  | (0.4,1.5)   |      |            |
| AUC and "accuracy"                   | + | + | + | + | N/A | N/A | + | + | 0.6  | low         |      |            |
| Inflation Factor and "Bias"          | + | + | + | + | N/A | N/A | + | + | 0.4  | Large       |      |            |

Consider only "given" and "not given" (exclude not recorded)

|                                              |      |   |     |   |     |     |      |   |      |   |      |              |
|----------------------------------------------|------|---|-----|---|-----|-----|------|---|------|---|------|--------------|
| > 10 counts in either column of 2x2 table    | No   |   | No  |   | N/A |     | No   |   | No   |   |      |              |
| Percent agreement (TN+TP/n) 2x2 table only % | 99.3 |   | 6.0 |   | N/A |     | 97.4 |   | 89.1 |   | 78.8 | (25.1,100.0) |
| Sensitivity % (95% CI)                       | +    | + | +   | + | N/A | N/A | +    | + | +    | + | 80.1 | (25.5,100.0) |
| Specificity % (95% CI)                       | +    | + | +   | + | N/A | N/A | +    | + | +    | + | 2.7  | (0.0,22.6)   |
| Positive Predictive Value % (95% CI)         | +    | + | +   | + | N/A | N/A | +    | + | +    | + |      |              |
| Negative Predictive Value % (95% CI)         | +    | + | +   | + | N/A | N/A | +    | + | +    | + |      |              |
| AUC and "accuracy"                           | +    | + | +   | + | N/A | N/A | +    | + | +    | + |      |              |
| Inflation Factor and "Bias"                  | +    | + | +   | + | N/A | N/A | +    | + | +    | + |      |              |

N= 15,645 (all women observer-assed to give birth in Tanzania, and those during use of the revised register in Bangladesh).

Pokhara excluded as has no column in the register.

CI=confidence interval

HMIS= health management information system

AUC= Area under the curve

N/A=data element not captured by routine register

+/=result suppressed due to 10 or fewer count per column of two-by-two table

As reported in an associated paper [1]

## Reference

1. Day L, Rahman QS, Rahman A, Salim N, KC A, Ruysen H, Tahsina T, Masanja H, Basnet O, Gore-langton G *et al*: **Assessment of the validity of the measurement of newborn and maternal health-care coverage in hospitals (EN-BIRTH): a mixed-methods observational study** *Lancet Global* (2020) DOI: 10.1016/S2214-109X(20)30504-0.
