# Supplementary material for: Uterotonics for prevention of postpartum haemorrhage: EN-BIRTH multi-country validation study
Source: PubMed Central journal article supplement (PMC7995712; doi:10.1186/s12884-020-03420-x), 2021-03-26
Supplement: 12884_2020_3420_MOESM11_ESM.pdf [file 12884_2020_3420_MOESM11_ESM.pdf]

Every Newborn BIRTH multi-country validation study: informing measurement of coverage and quality of maternal and newborn care

### **Uterotonics for prevention of postpartum haemorrhage: EN-BIRTH multi-country validation study**

Additional File 11: Comparison of uterotonic coverage measurement using original and revised Bangladesh registers, EN-BIRTH study (n=5,207)

|                                                                          | Old Register |     |        |      | New Register |     |        |      |
|--------------------------------------------------------------------------|--------------|-----|--------|------|--------------|-----|--------|------|
|                                                                          | %            | SD  | 95% CI |      | %            | SD  | 95% CI |      |
| <b>Data Extraction</b>                                                   |              |     |        |      |              |     |        |      |
| Azimpur                                                                  | 17.8         | 1.5 | 15.1   | 20.9 | 99.4         | 0.2 | 99.0   | 99.7 |
| Kushtia                                                                  | 0.0          | -   | -      | -    | 21.6         | 0.9 | 19.9   | 23.4 |
| <b>Data Extraction :<br/>NVD/Forceps/ Vacuum</b>                         |              |     |        |      |              |     |        |      |
| Azimpur                                                                  | 0.0          | -   | -      | -    | 98.9         | 0.4 | 97.6   | 99.5 |
| Kushtia                                                                  | 97.6         | 1.2 | 93.7   | 99.1 | 32.8         | 1.4 | 30.2   | 35.5 |
| <b>Data Extraction :<br/>Caesarean section (Elective/<br/>Emergency)</b> |              |     |        |      |              |     |        |      |
| Azimpur                                                                  | 25.5         | 2.0 | 21.7   | 29.6 | 99.6         | 0.1 | 99.2   | 99.8 |
| Kushtia                                                                  | 0.0          | -   | -      | -    | 6.0          | 0.8 | 4.5    | 7.7  |

N= 5,207 register recorded cases from original and revised registers in Bangladesh.

NVD= normal vaginal delivery

SD= Standard deviation

CI= Confidence interval

Register recorded uterotonic administration increased in both hospitals with roll out of new registers including a specific column for uterotonic documentation, although not equally.

Register recorded cases increased more in Azimpur than Kushtia.
