# Supplementary material for: Uterotonics for prevention of postpartum haemorrhage: EN-BIRTH multi-country validation study
Source: PubMed Central journal article supplement (PMC7995712; doi:10.1186/s12884-020-03420-x), 2021-03-26
Supplement: 12884_2020_3420_MOESM12_ESM.pdf [file 12884_2020_3420_MOESM12_ESM.pdf]

Every Newborn BIRTH multi-country validation study: informing measurement of coverage and quality of maternal and newborn care

### **Uterotonics for prevention of postpartum haemorrhage: EN-BIRTH multi-country validation study**

Additional File 12: Association testing for timing of Oxytocin administration, EN-BIRTH Study (n=22,121)

| <b>Uterotonics Timing<sup>1</sup></b>  | <b>Odds Ratio</b> | <b>Std. Err.</b> | <b>P-value</b> | <b>95% CI</b> |
|----------------------------------------|-------------------|------------------|----------------|---------------|
| <b>By Mode of Birth<sup>2</sup></b>    |                   |                  |                |               |
| <1 min                                 | 0.061             | 0.008            | 0.000          | 0.048 - 0.078 |
| 1<3 mins                               | 0.209             | 0.025            | 0.000          | 0.165- 0.264  |
| 3-<6 mins                              | 0.743             | 0.095            | 0.020          | 0.578 - 0.954 |
| 6-<9mins                               | 1.139             | 0.188            | 0.429          | 0.825 - 1.574 |
| <b>By Route of Administration (IM)</b> |                   |                  |                |               |
| <1 min                                 | 0.052             | 0.006            | 0.000          | 0.042 -0.065  |
| 1<3 mins                               | 0.213             | 0.023            | 0.000          | 0.172-0.263   |
| 3-<6 mins                              | 0.711             | 0.081            | 0.003          | 0.568-0.889   |
| 6-<9mins                               | 1.082             | 0.157            | 0.586          | 0.814-1.439   |

N=22,121 (women observer-assessed to receive oxytocin from 0 to 30 minutes after birth)

IM= intramuscular

<sup>1</sup>Reference >9 minutes

<sup>2</sup>Caesarean and vaginal births used as reference group

Assessed using univariate logistical regression test of association.
