# Supplementary material for: Uterotonics for prevention of postpartum haemorrhage: EN-BIRTH multi-country validation study
Source: PubMed Central journal article supplement (PMC7995712; doi:10.1186/s12884-020-03420-x), 2021-03-26
Supplement: 12884_2020_3420_MOESM13_ESM.pdf [file 12884_2020_3420_MOESM13_ESM.pdf]

Every Newborn BIRTH multi-country validation study: informing measurement of coverage and quality of maternal and newborn care

### Uterotonics for prevention of postpartum haemorrhage: EN-BIRTH multi-country validation study

Additional File 13: Oxytocin dose by EN-BIRTH site and mode of birth, EN-BIRTH study

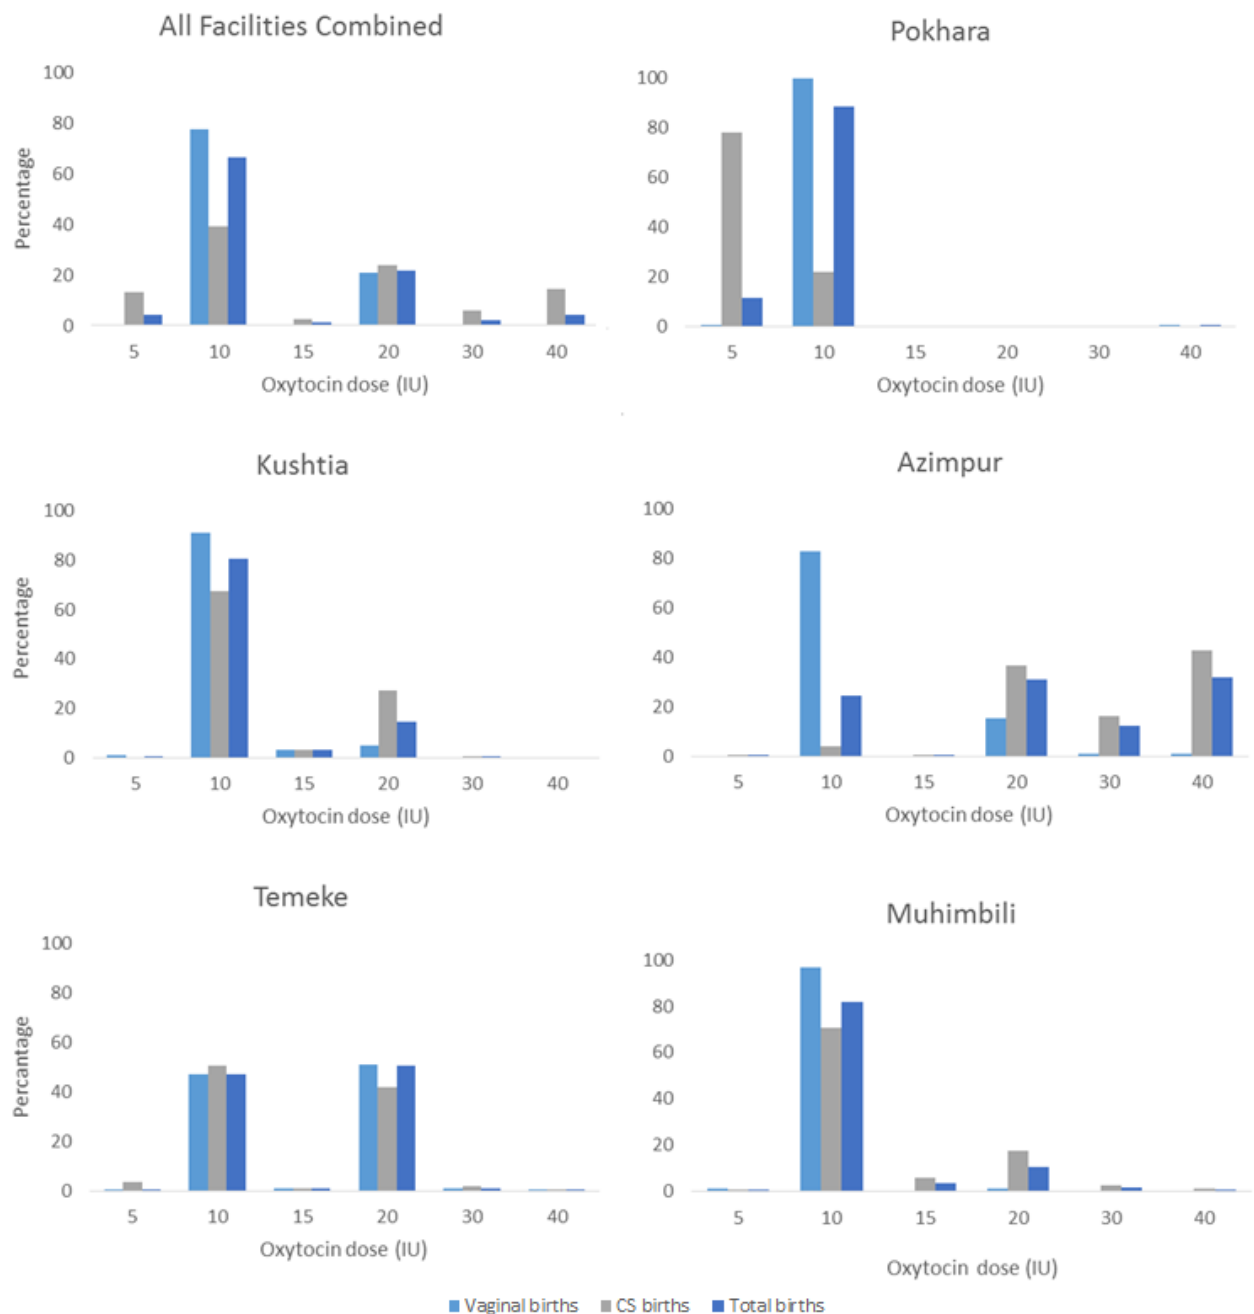

(n=22,269)

N= 22,269 women observed to receive oxytocin.

IU: international units

This is descriptive data therefore total column is based on individually weighted averages.
