# Supplementary material for: Uterotonics for prevention of postpartum haemorrhage: EN-BIRTH multi-country validation study
Source: PubMed Central journal article supplement (PMC7995712; doi:10.1186/s12884-020-03420-x), 2021-03-26
Supplement: 12884_2020_3420_MOESM14_ESM.pdf [file 12884_2020_3420_MOESM14_ESM.pdf]

Every Newborn BIRTH multi-country validation study: informing measurement of coverage and quality of maternal and newborn care

## Uterotonics for prevention of postpartum haemorrhage: EN-BIRTH multi-country validation study

Additional File 14: Estimated Blood Loss (EBL) compared with Oxytocin coverage, EN-BIRTH Study

|                                                                     | Bangladesh       |                  | Nepal            | Tanzania         |                    | Total*            |
|---------------------------------------------------------------------|------------------|------------------|------------------|------------------|--------------------|-------------------|
|                                                                     | Azimpur Tertiary | Kushtia District | Pokhara Regional | Temeke Regional  | Muhimbili National |                   |
|                                                                     | n(%)             | n(%)             | n(%)             | n(%)             | n(%)               |                   |
| <b>EBL for women who received 40IU Oxytocin</b>                     |                  |                  |                  |                  |                    |                   |
| <b>Total</b>                                                        | <b>900(100)</b>  | <b>0(0.0)</b>    | <b>2(100)</b>    | <b>5(100)</b>    | <b>31(100)</b>     | <b>938(100)</b>   |
| <b>All Modes of Birth Combined</b>                                  |                  |                  |                  |                  |                    |                   |
| Normal: ≤500 mls                                                    | 876(97.3)        | 0(0.0)           | 2(100.0)         | 5(100.0)         | 22(70.9)           | 905(96.5)         |
| PPH: >500 - ≤1000 mls                                               | 13(1.4)          | 0(0.0)           | 0(0.0)           | 5(100.0)         | 8(25.8)            | 21(2.2)           |
| Severe PPH > 1000 mls                                               | 3(0.3)           | 0(0.0)           | 0(0.0)           | 5(100.0)         | 0(0.0)             | 3(0.3)            |
| Missing                                                             | 8(0.9)           | 0(0.0)           | 0(0.0)           | 5(100.0)         | 1(3.2)             | 9(0.9)            |
| <b>Vaginal Births</b>                                               |                  |                  |                  |                  |                    |                   |
| Normal: ≤500 mls                                                    | 7(100.0)         | 0(0.0)           | 2(100.0)         | 4(100.0)         | 2(100.0)           | 15(100.0)         |
| PPH: >500 - ≤1000 mls                                               | 0(0.0)           | 0(0.0)           | 0(0.0)           | 0(0.0)           | 0(0.0)             | 0(0.0)            |
| Severe PPH > 1000 mls                                               | 0(0.0)           | 0(0.0)           | 0(0.0)           | 0(0.0)           | 0(0.0)             | 0(0.0)            |
| Missing                                                             | 0(0.0)           | 0(0.0)           | 0(0.0)           | 0(0.0)           | 0(0.0)             | 0(0.0)            |
| <b>Caesarean Births</b>                                             |                  |                  |                  |                  |                    |                   |
| Normal: ≤500 mls                                                    | 869(97.3)        | 0(0.0)           | 0(0.0)           | 1(100.0)         | 20(71.4)           | 890(96.5)         |
| PPH: >500 - ≤1000 mls                                               | 13(1.5)          | 0(0.0)           | 0(0.0)           | 0(0.0)           | 7(25.0)            | 20(2.1)           |
| Severe PPH > 1000 mls                                               | 3(0.3)           | 0(0.0)           | 0(0.0)           | 0(0.0)           | 0(0.0)             | 3(0.3)            |
| Missing                                                             | 8(0.9)           | 0(0.0)           | 0(0.0)           | 0(0.0)           | 1(3.6)             | 9(0.9)            |
| <b>EBL for women who received Oxytocin within 0-3 mins of birth</b> |                  |                  |                  |                  |                    |                   |
| <b>Total</b>                                                        | <b>2652(100)</b> | <b>2164(100)</b> | <b>5691(100)</b> | <b>4563(100)</b> | <b>2944(100)</b>   | <b>18014(100)</b> |
| <b>All Modes of Birth Combined</b>                                  |                  |                  |                  |                  |                    |                   |
| Normal: ≤500 mls                                                    | 2578(97.2)       | 2078(96.0)       | 5524(97.1)       | 4393(96.3)       | 2670(90.7)         | 17243(95.7)       |
| PPH: >500 - ≤1000 mls                                               | 46(1.7)          | 57(2.6)          | 92(1.6)          | 102(2.2)         | 204(6.9)           | 501(2.8)          |
| Severe PPH > 1000 mls                                               | 6(0.2)           | 8(0.4)           | 1(0.02)          | 4(0.1)           | 10(0.3)            | 29(0.2)           |
| Missing                                                             | 22(0.8)          | 21(0.9)          | 74(1.3)          | 64(1.4)          | 60(2.0)            | 241(1.3)          |
| <b>Vaginal Births</b>                                               |                  |                  |                  |                  |                    |                   |
| Normal: ≤500 mls                                                    | 624(96.3)        | 1197(96.0)       | 4568(96.8)       | 3980(97.2)       | 1037(95.1)         | 11406(96.8)       |
| PPH: >500 - ≤1000 mls                                               | 20(3.1)          | 41(3.3)          | 79(1.7)          | 45(1.1)          | 36(3.3)            | 221(1.9)          |
| Severe PPH > 1000 mls                                               | 2(0.3)           | 5(0.4)           | 1(0.02)          | 4(0.1)           | 2(0.2)             | 14(0.1)           |
| Missing                                                             | 2(0.3)           | 4(0.3)           | 71(1.5)          | 44(1.1)          | 15(1.4)            | 136(1.2)          |
| <b>Caesarean Births</b>                                             |                  |                  |                  |                  |                    |                   |
| Normal: ≤500 mls                                                    | 1951(97.6)       | 877(96.1)        | 951(98.3)        | 334(83.9)        | 1533(88.2)         | 5646(93.9)        |
| PPH: >500 - ≤1000 mls                                               | 25(1.3)          | 16(1.7)          | 13(1.3)          | 56(14.1)         | 162(9.3)           | 272(4.5)          |
| Severe PPH > 1000 mls                                               | 4(0.2)           | 3(0.3)           | 0(0.0)           | 0(0.0)           | 8(0.5)             | 15(0.2)           |
| Missing                                                             | 19(0.9)          | 17(1.9)          | 3(0.3)           | 8(2.0)           | 35(2.0)            | 82(1.4)           |

Estimated blood loss (EBL) was assessed via visual observation which can be inaccurate, especially for caesarean sections where blood loss is often underestimated.

\*Descriptive data: total column is therefore based on individually weighted averages.
