# Supplementary material for: Uterotonics for prevention of postpartum haemorrhage: EN-BIRTH multi-country validation study
Source: PubMed Central journal article supplement (PMC7995712; doi:10.1186/s12884-020-03420-x), 2021-03-26

Every Newborn BIRTH multi-country validation study: informing measurement of coverage and quality of maternal and newborn care

### Uterotonics for prevention of postpartum haemorrhage: EN-BIRTH multi-country validation study

Additional File 15: Assessment of routine recording responsibilities for uterotonic provision, EN-BIRTH Study

a. As reported by EN-BIRTH data collectors

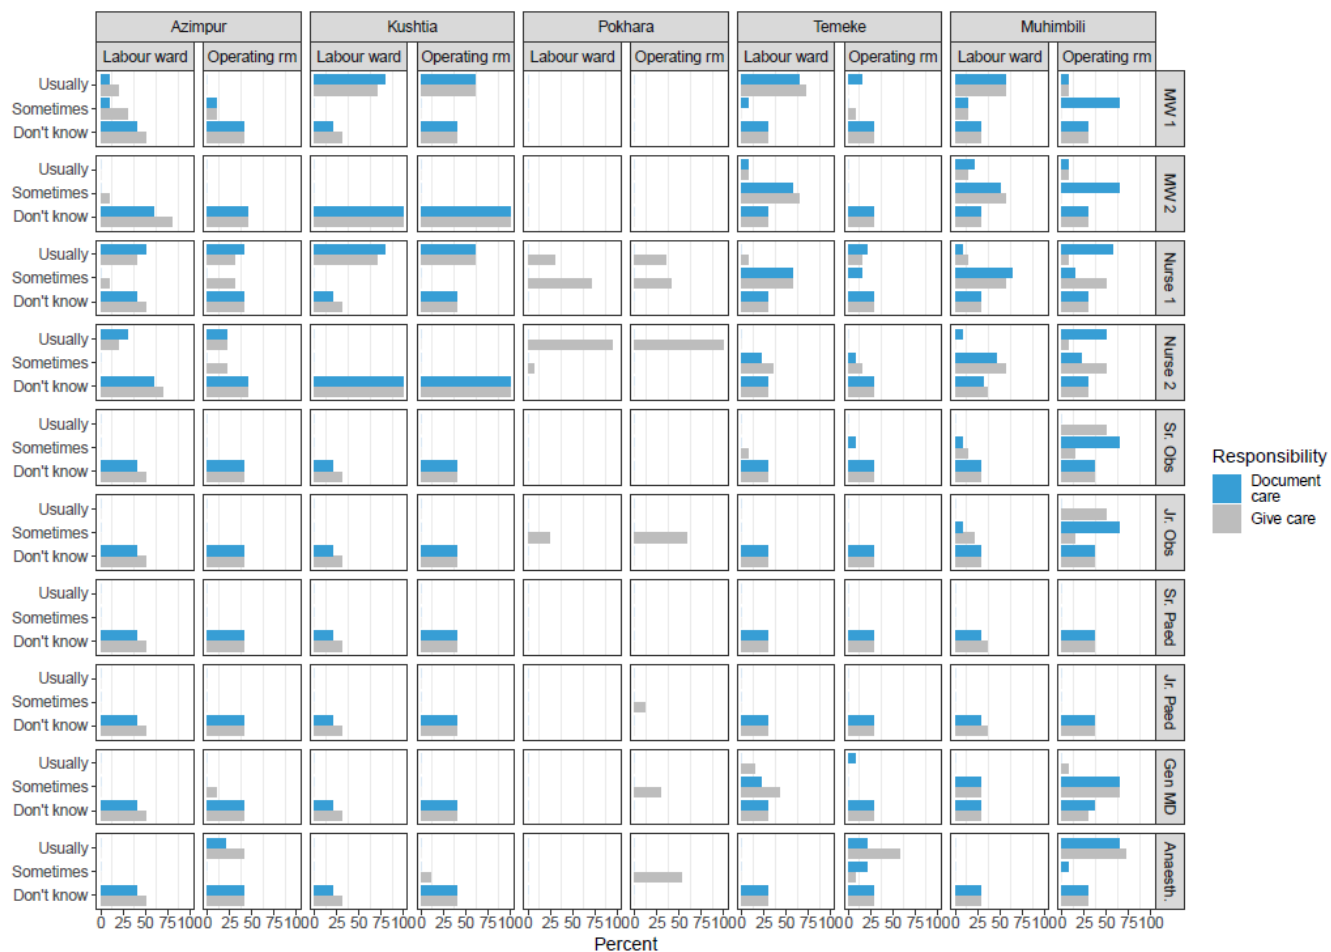

b. As reported by health workers

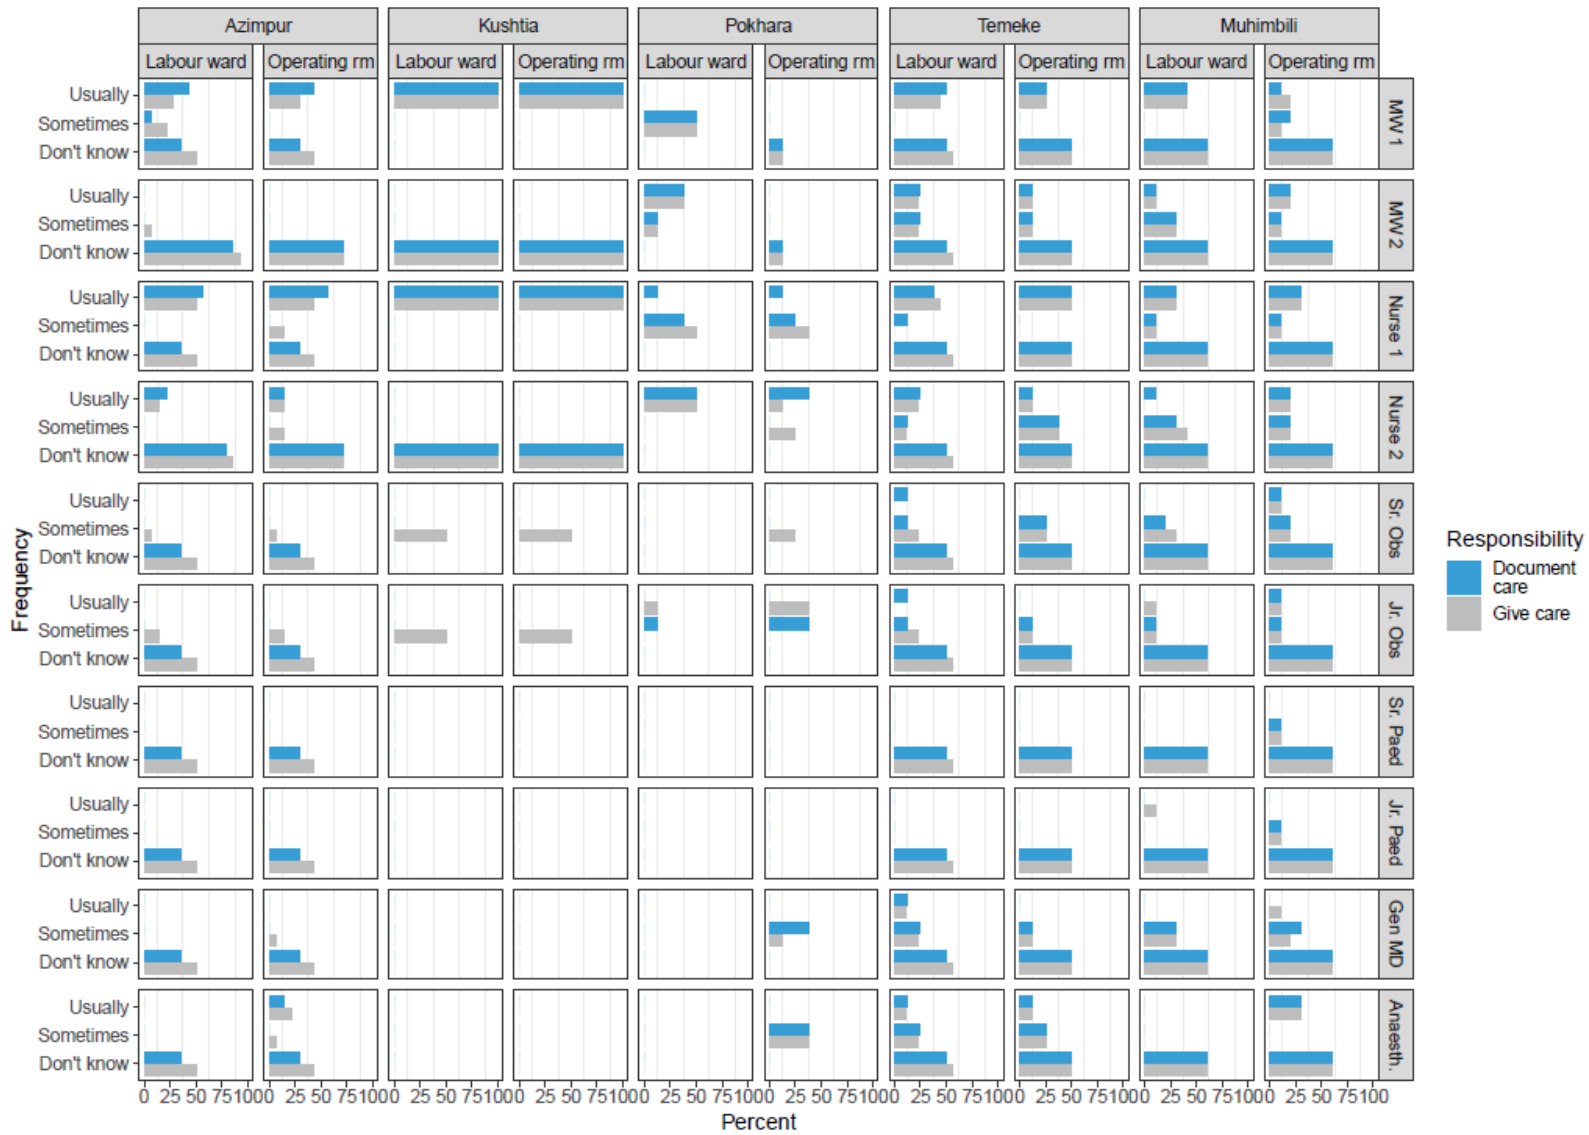

Supplement: 12884_2020_3420_MOESM15_ESM.pdf [file 12884_2020_3420_MOESM15_ESM.pdf]
